# Supplementary material for: Within-Host Bacterial Diversity Hinders Accurate Reconstruction of Transmission Networks from Genomic Distance Data
Source: PLoS Comput Biol. 2014 Mar 27;10(3):e1003549. doi: 10.1371/journal.pcbi.1003549 (PMC3967931; doi:10.1371/journal.pcbi.1003549)
Supplement: Text S1 — Demonstration that the expected sample diversity is equal to original diversity, regardless of the size of the bottleneck. (DOC) [file pcbi.1003549.s007.doc]

Supporting Information

*Proof that the expected sample diversity is equal to original diversity, regardless of the size of the bottleneck*

Consider a large population composed of genotypes, in proportions . The diversity of this population can be measured by Simpson’s diversity index , or the expected pairwise genetic distance, . We take a random sample of size , observing of each genotype (or equivalently, proportions), and thus measure the sample diversity of the new population as, or. Using the properties of the multinomial distribution, we have

,

and

,

so therefore

and
